# Supplementary material for: Relationships between Maternal Obesity and Maternal and Neonatal Iron Status
Source: PubMed Central journal article supplement (PMC6115715; doi:10.3390/nu10081000), 2018-07-30
Supplement: nutrients-10-01000-s001.pdf [file nutrients-10-01000-s001.pdf]

Table S1. Association between maternal obesity and maternal inflammatory and iron status. Differences and 95% confidence intervals.

| <b>Indicator</b>                      | <b>BMI category</b> | <b>Adjusted difference</b> | <b>95% CI</b> |
|---------------------------------------|---------------------|----------------------------|---------------|
| Ferritin (ug/l)                       | Normal weight       | Reference                  |               |
|                                       | Obese               | 0.03                       | (-0.15, 0.20) |
| Ferritin <15ug/l*                     | Normal weight       | Reference                  |               |
|                                       | Obese               | 1.13                       | (0.58, 2.19)  |
| Soluble transferrin receptor (nmol/l) | Normal weight       | Reference                  |               |
|                                       | Obese               | 3.43                       | (2.50, 4.35)  |
| sTfR:log <sub>10</sub> sF             | Normal weight       | Reference                  |               |
|                                       | Obese               | 0.17                       | (0.08, 0.26)  |
| Hepcidin (ng/ml)                      | Normal weight       | Reference                  |               |
|                                       | Obese               | 0.04                       | (-1.79, 1.88) |
| CRP>5mg/l*                            | Normal weight       | Reference                  |               |
|                                       | Obese               | 0.20                       | (0.12, 0.33)  |
| IL-6>1pg/ml*                          | Normal weight       | Reference                  |               |
|                                       | Obese               | 0.02                       | (0.00, 0.07)  |

Multiple linear regression, adjusted for ethnicity, parity, educational level and smoking. \*Multiple logistic regression adjusted for ethnicity, parity, educational level and smoking. sF, ferritin; sTfR, soluble transferrin receptor; CRP, c-reactive protein; IL-6, interleukin 6.

Table S2. Association between maternal obesity and neonatal iron status. Differences and 95% confidence intervals.

| <b>Indicator</b>  | <b>BMI category</b> | <b>Adjusted difference</b> | <b>95% CI</b> |
|-------------------|---------------------|----------------------------|---------------|
| Ferritin (ug/l)   | Normal weight       | Reference                  |               |
|                   | Obese               | -0.12                      | (-0.26, 0.01) |
| Ferritin <76ug/l* | Normal weight       | Reference                  |               |
|                   | Obese               | 0.73                       | (0.39, 1.37)  |

Multiple linear or logistic regression, adjusted for ethnicity, parity, smoking, gestational age at delivery, and caesarean delivery. \*Multiple logistic regression, adjusted for ethnicity, parity, smoking, gestational age at delivery, and caesarean delivery.
